# Supplementary material for: A Phase 2 Study of Bortezomib in Relapsed, Refractory Myeloma
Source: Atypon-hosted journal article supplement (doi:10.1056/nejmoa030288), 2003-06-25
Supplement: nejm_richardson_2609sa1-4.pdf [file nejm_richardson_2609sa1-4.pdf]

# Supplementary Appendix

This appendix has been provided by the authors to give readers additional information about their work.

Supplement to: Richardson PG, Barlogie B, Berenson J, et al. A Phase 2 Study of Bortezomib in Relapsed, Refractory Myeloma. *N Engl J Med* 2003;348:2609-17.

**Supplementary Appendix 1. Improvement in Platelet Counts and Nonmyeloma Immunoglobulin Levels during the Study.\***

| Variable                                                             | Base Line | End of Study |
|----------------------------------------------------------------------|-----------|--------------|
| <b>All 202 patients</b>                                              |           |              |
| Mean platelet count (per mm <sup>3</sup> )                           | 160,000   | 189,000      |
| <b>53 Patients with a complete or partial response to bortezomib</b> |           |              |
| Mean IgM level (g/liter)                                             | 0.30      | 0.60         |
| Mean IgA level (g/liter)                                             | 0.34      | 0.46         |
| Mean IgG level (g/liter)                                             | 4.68      | 6.20         |

\* Statistical testing for significance was not performed.

**Supplementary Appendix 2. Changes in Karnofsky Performance Score during the Study.\***

| Category of Response to Bortezomib | Change in Karnofsky Performance Score |                   |                   |            |            |
|------------------------------------|---------------------------------------|-------------------|-------------------|------------|------------|
|                                    | 10-Point Increase                     | 20-Point Increase | 30-Point Increase | No Change  | Decrease   |
|                                    | <i>no./total no. (%)</i>              |                   |                   |            |            |
| Complete or partial response       | 11/52 (21)                            | 5/52 (10)         | 0                 | 23/52 (44) | 13/52 (25) |
| Minimal response or stable disease | 11/59 (19)                            | 1/59 (2)          | 0                 | 26/59 (44) | 21/59 (36) |
| Progressive disease                | 9/75 (12)                             | 2/75 (3)          | 2/75 (3)          | 23/75 (31) | 39/75 (52) |

\* Data were available for 186 patients. Scores range from 0 to 100 (in increments of 10), with higher scores indicating better function.

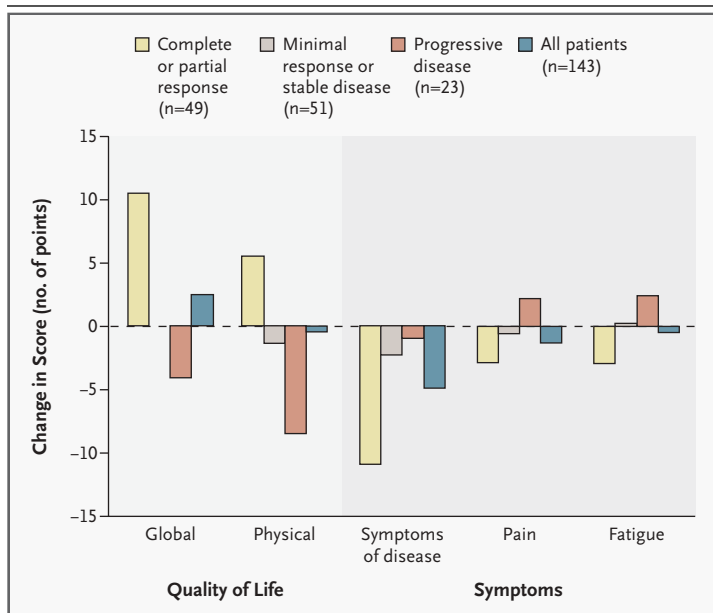

**Supplementary Appendix 3. Mean Changes in Quality-of-Life Scores, According to Category of Response.**

The scores for the quality of life and pain are from the core quality-of-life questionnaire (QLQ-C30) of the European Organization for Research and Treatment of Cancer (EORTC), scores for symptoms of disease are from the EORTC multiple myeloma module (QLQ-MY24), and the fatigue scores are from the fatigue subscale of the Functional Assessment of Chronic Illness Therapy. For quality-of-life measures, a positive score indicates improvement; for measures of symptoms, a negative score indicates improvement. Scores for fatigue range from 0 to 52; all other scores range from 0 to 100. Twenty patients who could not be evaluated were excluded from the analysis.

**Supplementary Appendix 4. Subgroup Analysis of Response to Bortezomib Monotherapy.\***

| Characteristic              | Complete or Partial Response<br><i>no./total no. (%)</i> | P Value |
|-----------------------------|----------------------------------------------------------|---------|
| Age                         |                                                          | 0.06    |
| <65 yr                      | 40/124 (32)                                              |         |
| ≥65 yr                      | 13/69 (19)                                               |         |
| Sex                         |                                                          | 0.74    |
| Male                        | 31/118 (26)                                              |         |
| Female                      | 22/75 (29)                                               |         |
| Race                        |                                                          | 0.06    |
| White                       | 38/157 (24)                                              |         |
| Black                       | 10/21 (48)                                               |         |
| Other                       | 5/15 (33)                                                |         |
| Body-surface area           |                                                          | 0.40    |
| ≤2 m <sup>2</sup>           | 31/123 (25)                                              |         |
| >2 m <sup>2</sup>           | 22/70 (31)                                               |         |
| Karnofsky performance score |                                                          | 0.52    |
| ≤70                         | 12/34 (35)                                               |         |
| 80                          | 20/74 (27)                                               |         |
| ≥90                         | 20/80 (25)                                               |         |
| Type of myeloma             |                                                          | 0.41    |
| IgG                         | 28/116 (24)                                              |         |
| IgA                         | 15/47 (32)                                               |         |
| Light chain                 | 9/27 (33)                                                |         |
| Bone marrow biopsy results  |                                                          | 0.03    |
| Plasma cells >50%           | 17/85 (20)                                               |         |
| Plasma cells ≤50%           | 33/93 (35)                                               |         |
| Cytogenetic abnormalities   |                                                          | 0.05    |
| Abnormal                    | 11/57 (19)                                               |         |
| Normal                      | 37/105 (35)                                              |         |
| Deletion of chromosome 13   |                                                          | 0.81    |
| Yes                         | 6/25 (24)                                                |         |
| No                          | 47/168 (28)                                              |         |
| Hemoglobin level            |                                                          | 0.14    |
| <10.5 g/dl                  | 24/105 (23)                                              |         |
| ≥10.5 g/dl                  | 29/88 (33)                                               |         |

\* P values were determined by a two-sided Fisher's exact test.
